# Supplementary material for: Nutrient Composition of Germinated Foxtail Millet Flour Treated with Mixed Salt Solution and Slightly Acidic Electrolyzed Water
Source: MDPI journal article supplement (doi:10.3390/foods12010075), 2022-12-23
Supplement: s1 [file s1]

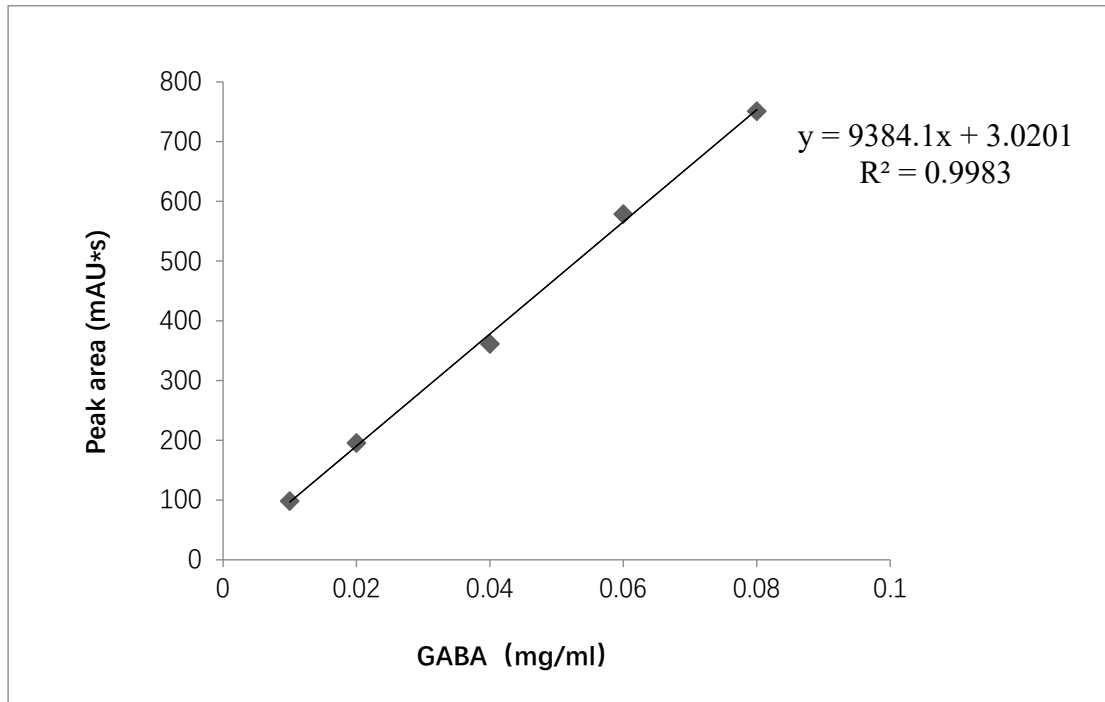

Figure S1. GABA standard curve.

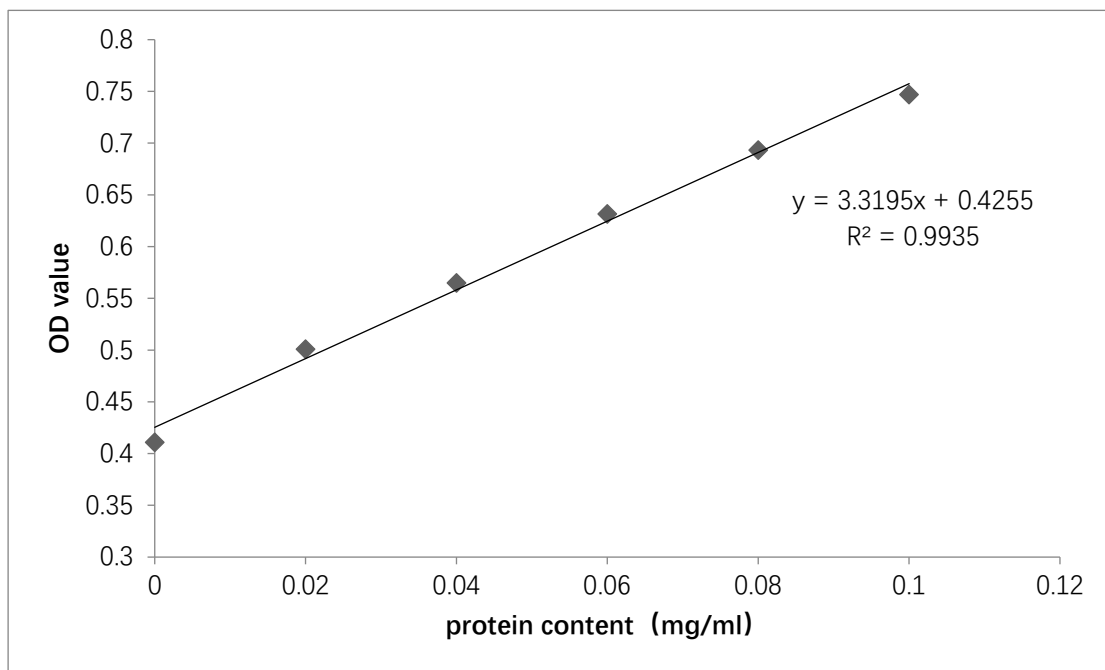

Figure S2. Protein standard curve

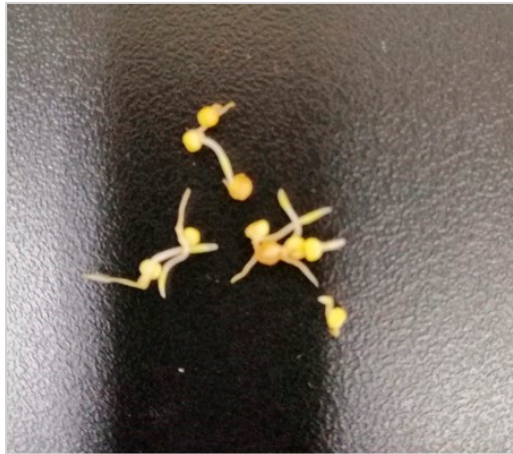

Tap water

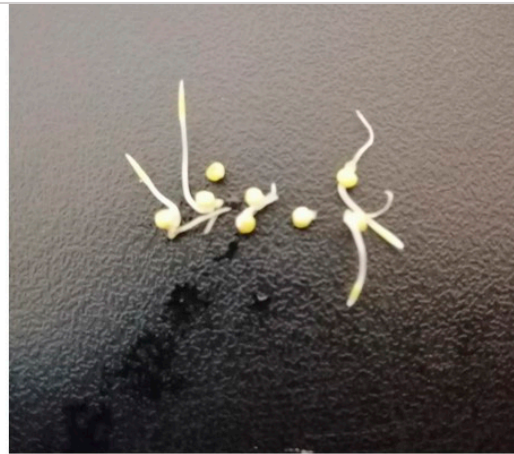

SAEW 1

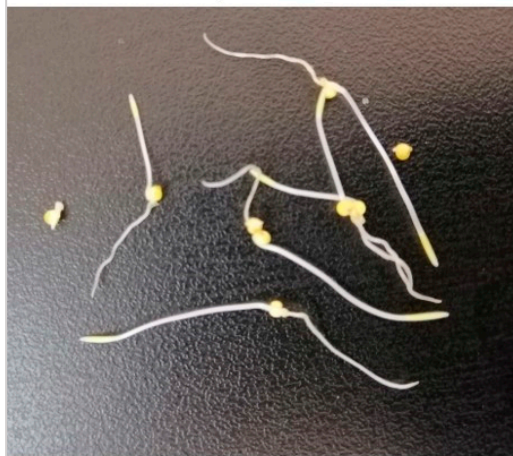

SAEW 2

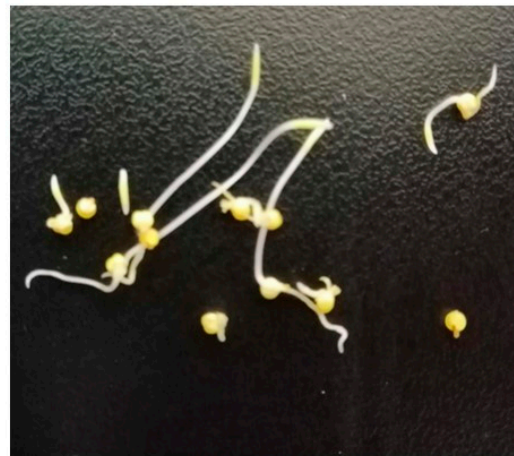

SAEW 3

Figure S3. Germinated foxtail millet with different treatments for 60h.
